# Supplementary material
Source: MDPI journal article supplement (https://www.mdpi.com/2073-4344/11/8/938)
Supplement: s1 [file s1]

Supplementary Materials

# Immobilization of TiO<sub>2</sub> Nanoparticles in Cement for Improved Photocatalytic Reactivity and Treatment of Organic Pollutants

Hannah M. McIntyre and Megan L. Hart \*

Department of Civil and Mechanical Engineering, School of Computing and Engineering, University of Missouri–Kansas City, 5110 Rockhill Rd, 352 Flarsheim Hall, Kansas City, MO 64110, USA; hmmg2d@umsystem.edu

\* Correspondence: hartme@umsystem.edu

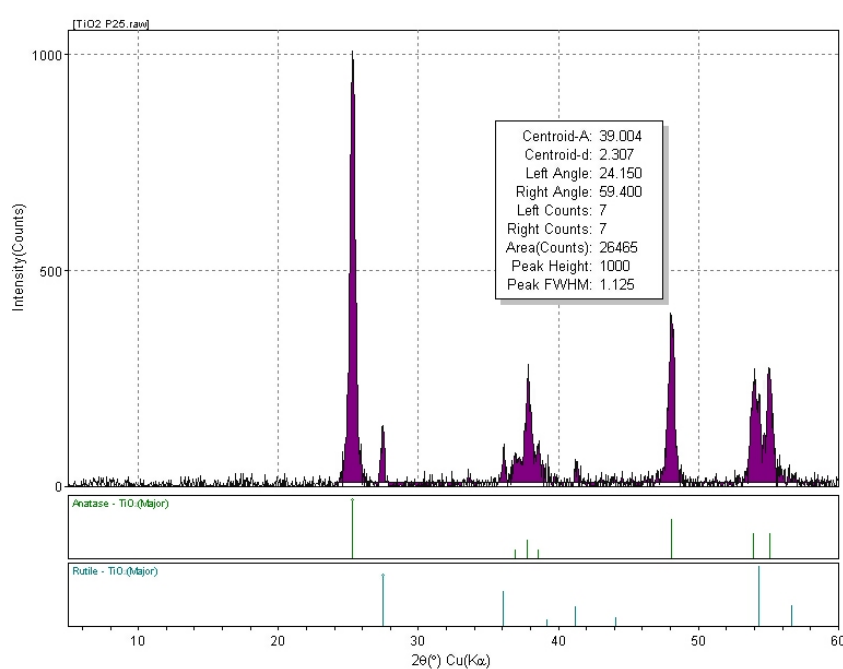

**Figure S1.** Crystalline Area of TiO<sub>2</sub>.

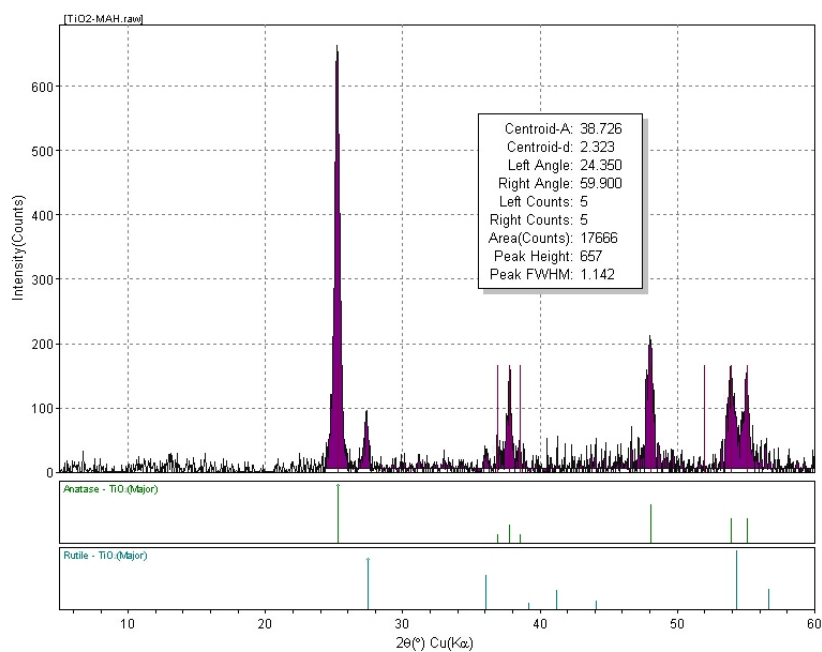

**Figure S2.** Crystalline Area of Ti-MAH.

**Table S1.** Rutile Miller Index.

| # | d (Å) | (h k l) | 2-Theta | p  |
|---|-------|---------|---------|----|
| 1 | 3.248 | (1 1 0) | 27.438  | 4  |
| 2 | 2.488 | (1 0 1) | 36.076  | 8  |
| 3 | 2.297 | (2 0 0) | 39.194  | 4  |
| 4 | 2.187 | (1 1 1) | 41.237  | 8  |
| 5 | 2.054 | (2 1 0) | 44.047  | 8  |
| 6 | 1.687 | (2 1 1) | 54.321  | 16 |
| 7 | 1.624 | (2 2 0) | 56.631  | 4  |

**Table S2.** Anatase Miller Index.

| # | d (Å) | (h k l) | 2-Theta | p  |
|---|-------|---------|---------|----|
| 1 | 3.517 | (1 0 1) | 25.303  | 8  |
| 2 | 2.431 | (1 0 3) | 36.948  | 8  |
| 3 | 2.378 | (0 0 4) | 37.793  | 2  |
| 4 | 2.333 | (1 1 2) | 38.565  | 8  |
| 5 | 1.893 | (2 0 0) | 48.033  | 4  |
| 6 | 1.759 | (2 0 2) | 51.957  | 8  |
| 7 | 1.700 | (1 0 5) | 53.885  | 8  |
| 8 | 1.667 | (2 1 1) | 55.057  | 16 |

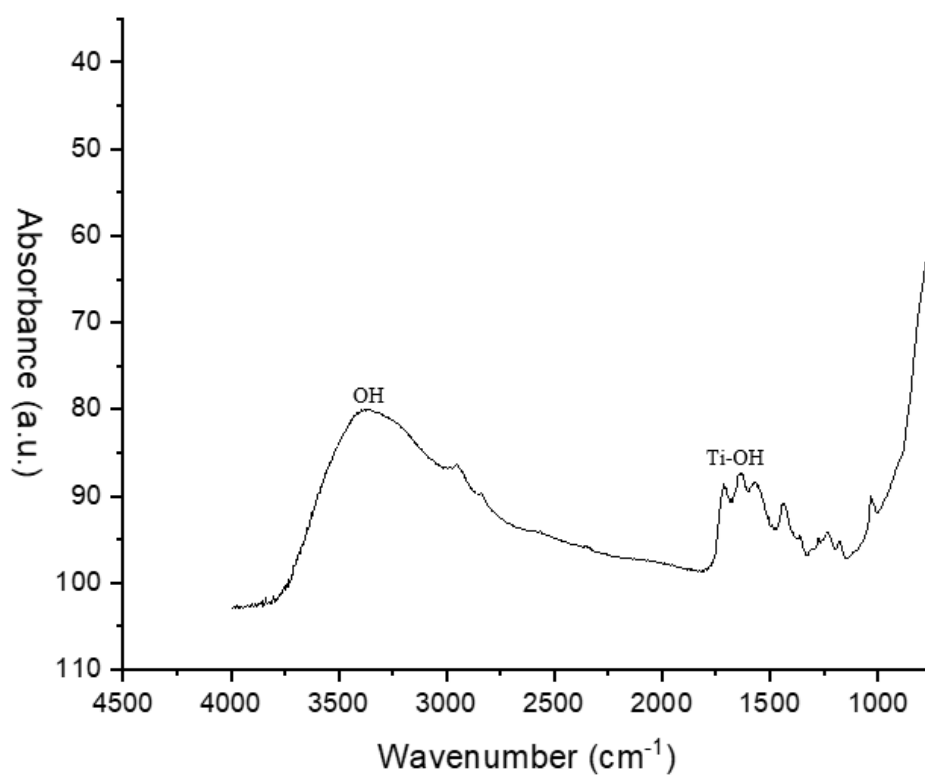

**Figure S3.** FT-IR Spectrum of TiO<sub>2</sub>.

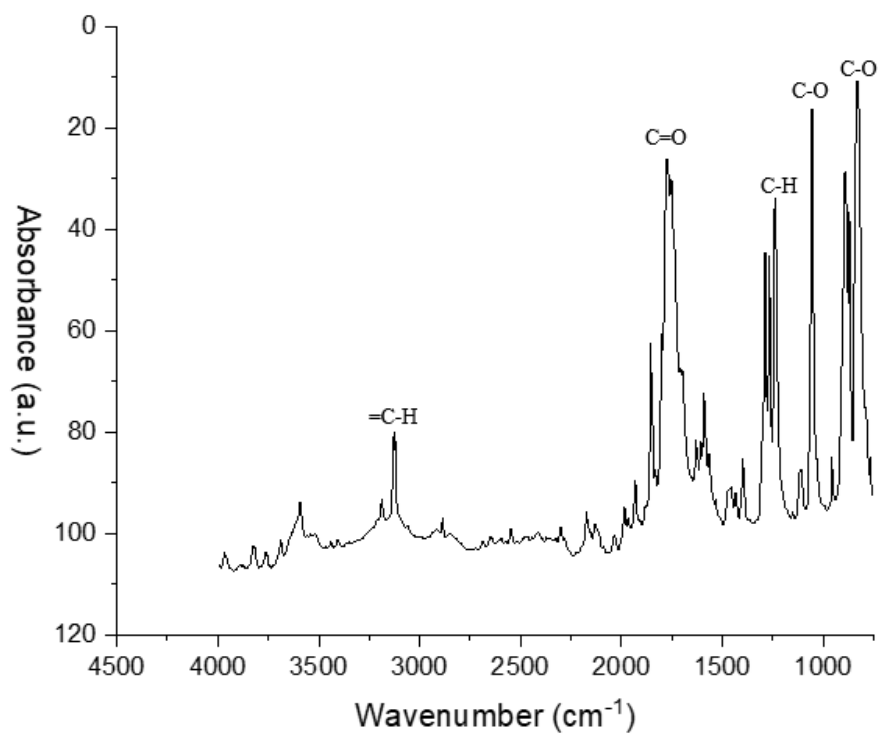

**Figure S4.** FT-IR Spectrum of Maleic Anhydride.

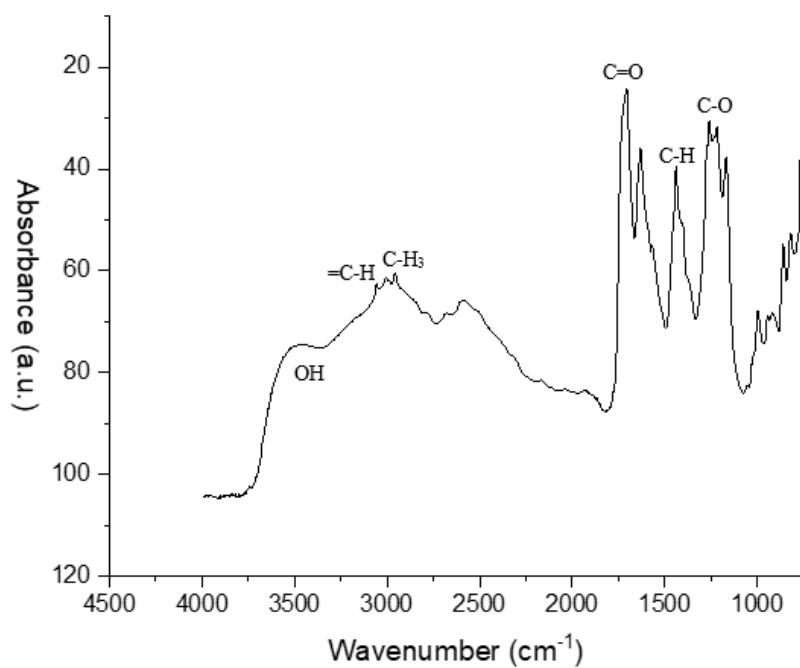

**Figure S5.** FT-IR Spectrum of Ti-MAH.

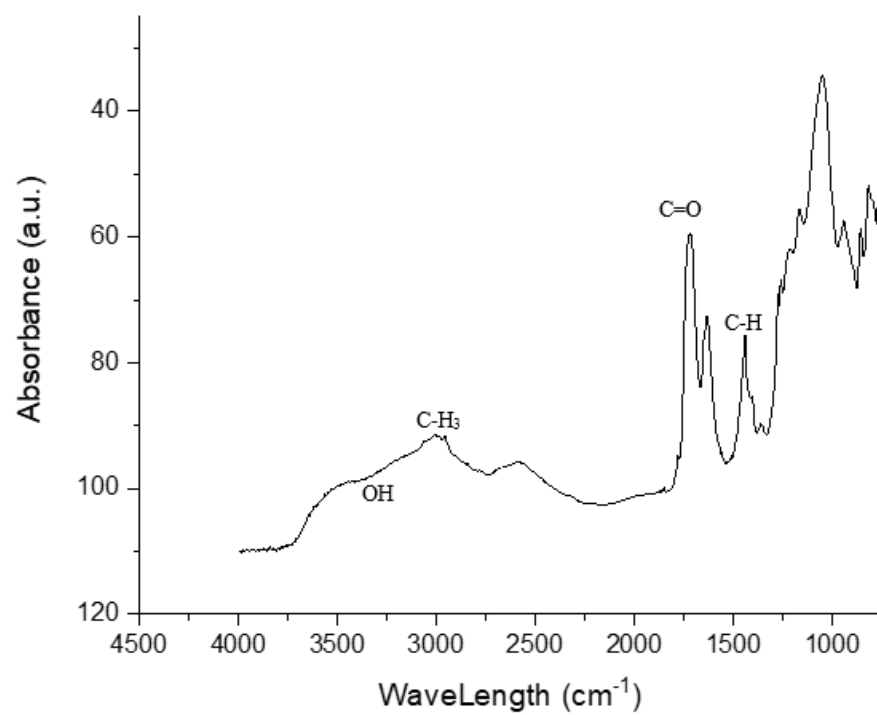

**Figure S6.** FT-IR Spectrum of Ti-MAH-Si.
